# Supplementary material for: The Transcription Factor MdERF78 Is Involved in ALA-Induced Anthocyanin Accumulation in Apples
Source: Front Plant Sci. 2022 Jun 2;13:915197. doi: 10.3389/fpls.2022.915197 (PMC9201628; doi:10.3389/fpls.2022.915197)
Supplement: Supplementary file 7 [file Table_1.XLSX]

## Sheet: Sheet1
Table S1. Primer sequences used in this study.
Primer name	Primer Sequence (5’-3’)	Used for
qMdActin F	TGACCGAATGAGCAAGGAAATTACT	qRT-PCR analysis
qMdActin R	TACTCAGCTTTGGCAATCCACATC	qRT-PCR analysis
qMdPAL F	GCTTCTATGGTTCTGTTTGACGC	qRT-PCR analysis
qMdPAL R	TGTTCTAAGAGCATACCTGTCCT	qRT-PCR analysis
qCHS F	TGTCGGCGGCACAAACCATTCTC	qRT-PCR analysis
qCHS R	CCAGTCCGAAATCCCAATAGGCT	qRT-PCR analysis
qMdCHI F	GGCTCCACCACCATCGCTCGCTG	qRT-PCR analysis
qMdCHI R	GAATCTCCAACCCCCTCATCCCT	qRT-PCR analysis
qMdFLS F	CATTAGGTCGGAGAACGAGCAAC	qRT-PCR analysis
qMdFLS R	AATGTCGTGGTTCACTATCTGGT	qRT-PCR analysis
qMdF3H F	TGGGGTATTTTCCAGATTGTTGA	qRT-PCR analysis
qMdF3H R	CCTGTAAATGACTGGACACGATG	qRT-PCR analysis
qMdDFR F	GATAGGGTTTGAGTTCAAGTA	qRT-PCR analysis
qMdDFR R	TCTCCTCAGCAGCCTCAGTTTTCT	qRT-PCR analysis
qMdANS F	GGAGAAGATCATCCTTAAGCCA	qRT-PCR analysis
qMdANS R	CTAAGATATATCATACCAACTATGCC	qRT-PCR analysis
qUFGT F	CCACCGCCCTTCCAAACACTCT	qRT-PCR analysis
qUFGT R	CACCCTTATGTTACGCGGCATGT	qRT-PCR analysis
qGSTF12 F	TGGCGACGCTGCATTAATCAAT	qRT-PCR analysis
qGSTF12 R	CAGTCACCAAATGCCCCAGTTT	qRT-PCR analysis
qMdMATE8-F	CTTCTTACTGTTGCCGATT	qRT-PCR analysis
qMdMATE8-R	TCTGAGCCTGGAGGAACTTTT	qRT-PCR analysis
qMdMYB1 F	ATAACGAAAACCTGAGTGTGAGA	qRT-PCR analysis
qMdMYB1 R	GCCTGCTTTGTATGAAACTTGGT	qRT-PCR analysis
qMYB9 F	CTCATTGTCAGGCTCCATAACC	qRT-PCR analysis
qMYB9 R	GAGAAGTTTCTTTCGAGGATCC	qRT-PCR analysis
qMYB10 F	GGAAACAGGTGGTCATTGATTG	qRT-PCR analysis
qMYB10 R	GGCTGAGGTCTTATCACATTGGT	qRT-PCR analysis
qMd110a F	AACAGGTGGTCGTTGATTGCTG	qRT-PCR analysis
qMd110a R	TTCGGGGTTGAGGTCTGATCAC	qRT-PCR analysis
qMdbHLH3 R	AGGGTTCCAGAAGACCACGCCT	qRT-PCR analysis
qMdbHLH3 R	TTGGATGTGGAGTGCTCGGAGA	qRT-PCR analysis
qMdbHLH33 F	GGGGTGAGGGGTACTACAATGG	qRT-PCR analysis
qMdbHLH33 R	TGCTGCTCAGTCTCAGTCTCAC	qRT-PCR analysis
qMdTTG1 F	TTTTGACTGGGCTGAGTTTGAC	qRT-PCR analysis
qMdTTG1 R	AGCAAACACATTGAAGCCACC	qRT-PCR analysis
qMdERF42 F	CGACTCTTCCTAACCCTCCCAC	qRT-PCR analysis
qMdERF42 R	TCTTACGTGGCTCCCGAATCTC	qRT-PCR analysis
qMdERF30 F	CGGTCAAAATCCACTTCGCGAA	qRT-PCR analysis
qMdERF30 R	AGAATGTACCGAGCCAGATCCG	qRT-PCR analysis
qMdERF15 F	GGTTCGCGAATTCGGAGATTCC	qRT-PCR analysis
qMdERF15 R	CAAACAGGTCCGAAAGCGACTC	qRT-PCR analysis
qMdERF109 F	CACGTTTACAACTGCCGAGGAC	qRT-PCR analysis
qMdERF109 R	TCGGTAACTACTTGCTGCTGCT	qRT-PCR analysis
qMdERF151 F	TGGAGGGGAAGAGAGGACCA	qRT-PCR analysis
qMdERF151 R	TGCCTAACCATAGCCGTGCT	qRT-PCR analysis
qMdERF170 F	AGGCAGCAAGGGCATACGAT	qRT-PCR analysis
qMdERF170 R	CGGCGTCAATGGAGTTTCCG	qRT-PCR analysis
qMdERF37 F	GGCACCCAGTTTACAGAGGAGT	qRT-PCR analysis
qMdERF37 R	AAATTGAGGCAGGCAAGCTTCC	qRT-PCR analysis
qMdERF2 F	GAGGCCGTGGGGAAAATTCG	qRT-PCR analysis
qMdERF2 R	CAACCCAATCCGGTGAGGGA	qRT-PCR analysis
MdERF41 F	ACCTCCAATCCCAACGCCTTTA	qRT-PCR analysis
MdERF41 R	TCTTACGTGGCTCCCGAATCTC	qRT-PCR analysis
MdERF79 F	AACGTTCGAAACAGCGGAAGAC	qRT-PCR analysis
MdERF79 R	TTGGTCATCTGGAGTGAAGCCA	qRT-PCR analysis
MdERF13 F	GGGGTCCTACACTCCCACTTAC	qRT-PCR analysis
MdERF13 R	GCTCCACAAGCGAATGTCACTT	qRT-PCR analysis
qMdERF32 F	GATTGTTGCAGACTCGCCCG	qRT-PCR analysis
qMdERF32 R	CCCCAGTTGCGCTTACGAAC	qRT-PCR analysis
MdERF68 F	AAAATCAAGGGGTGTCTCGGGT	qRT-PCR analysis
MdERF68 R	CGAATCTCGGCAGCCCATTTAC	qRT-PCR analysis
MdERF101 F	TTGGAGGCGATTGCAAGAATGG	qRT-PCR analysis
MdERF101 R	CGTCAACGAAGCTCCAAAGGTC	qRT-PCR analysis
qMdERF54 F	AGTGCGGATCAGGCAAAGGA	qRT-PCR analysis
qMdERF54 R	TCCCTCATTGCCGGTGTCTC	qRT-PCR analysis
MdERF153 F	TGCTCGTCTGTGGCTTGGTA	qRT-PCR analysis
MdERF153 R	AGGAGGATAAGGAGGAGACCCC	qRT-PCR analysis
MdERF1B F	ACATTTGACAGTGCTGAAGCCG	qRT-PCR analysis
MdERF1B R	CCTTCTCATGGAGTGCTTTCGC	qRT-PCR analysis
qMdERF78 F	GATATCGAGGCGTCCGACAAAG	qRT-PCR analysis
qMdERF78 R	TAGGTAGGTTGTGGTGGCACAA	qRT-PCR analysis
MdERF14 F	CGACATCAAGTACAAGGGCGTC	qRT-PCR analysis
MdERF14 R	GCGGGTTGTCGGGGAAATTAAA	qRT-PCR analysis
MdERF95 F	CAATGCCATGTCATCCGTCTCG	qRT-PCR analysis
MdERF95 R	CAAGCTCAGTTGCTGGTTCCTG	qRT-PCR analysis
MdERF12 F	TTTGGTCTCGTCTCCCTCGATG	qRT-PCR analysis
MdERF12 R	GATTCAAGGCGCCATCGAACAT	qRT-PCR analysis
qNbActin F	TCCGATGCCCTGAAGTCCTTTT	qRT-PCR analysis
qNbActin R	AGGAAACATAGTCGAACCGCCA	qRT-PCR analysis
qGUS F	GTAACCACGCGTCTGTTGACTG	qRT-PCR analysis
qGUS R	CTCTGTCTGGCTTTTGGCTGTG	qRT-PCR analysis
MdERF78-PGADT7 F	gccatggaggccagtgaattcATGGCGAGACCGCAACAGC	Vector construction
MdERF78-PGADT7 R	cagctcgagctcgatggatccTTAGGTAGGTTGTGGTGGCACA	Vector construction
MdMYB1-PGADT7 F	gccatggaggccagtgaattcATGGAGGGATATAACGAAAACCTG	Vector construction
MdMYB1- PGADT7 R	cagctcgagctcgatggatccCTATTCTTCTTTTGAATGATTCCAAAG	Vector construction
MYB110-PGADT7 F	aaaacgacggccagtgaattcATGGAGGGATATAACGTTAACTTGAG	Vector construction
MYB110-PGADT7 R	acgggggactctagaggatccACTCAAGACTGGGACATACAGTTCTT	Vector construction
MdERF78-PGBKT7 F	atggccatggaggccgaattcATGGCGAGACCGCAACAGC	Vector construction
MdERF78-PGBKT7 R	ccgctgcaggtcgacggatccTTAGGTAGGTTGTGGTGGCACA	Vector construction
MdERF78-N-PGBKT7 F	atggccatggaggccgaattcATGGCGAGACCGCAACAGC	Vector construction
MdERF78-N-PGBKT7 R	ccgctgcaggtcgacggatccATAAGGGAAGTTTGTTCTTGCCC	Vector construction
MdERF78-C-PGBKT7 F	atggccatggaggccgaattcAACCCAAATGCGTCTCAGTCC	Vector construction
MdERF78-C-PGBKT7R	ccgctgcaggtcgacggatccTTAGGTAGGTTGTGGTGGCACA	Vector construction
MdERF78-PGreenII-62sk F	cgctctagaactagtggatccATGGCGAGACCGCAACAGC	Vector construction
MdERF78-PGreenII-62sk R	gtcgacggtatcgataagcttTTAGGTAGGTTGTGGTGGCACA	Vector construction
MdMYB1-PGreenII-62sk F	cgctctagaactagtggatccATGGAGGGATATAACGAAAACCTG	Vector construction
MdMYB1-PGreenII-62sk R	gtcgacggtatcgataagcttCTATTCTTCTTTTGAATGATTCCAAAG	Vector construction
MdF3H-pGreenII-0800 F	gtcgacggtatcgataagcttGAAAGGTATACCAACAATGTCATTTTC	Vector construction
MdF3H-pGreenII-0800 R	cgctctagaactagtggatccATTTTGGTGTTGAATTTTTTTGGC	Vector construction
MdDFR-pGreenII-0800 F	gtcgacggtatcgataagcttATGTAATGAATAATATAAGAGAAAGGTAAAAA	Vector construction
MdDFR-pGreenII-0800 R	cgctctagaactagtggatccATCTTGTGTGTATGTGCTTACCGAA	Vector construction
MdANS-pGreenII-0800 F	gtcgacggtatcgataagcttGAATTCGGATCGAAAAACAAATG	Vector construction
MdANS-pGreenII-0800 R	cgctctagaactagtggatccTTTTGGAGCTGGCTTTCGAC	Vector construction
MdUFGT-pGreenII-0800 F	gtcgacggtatcgataagcttCATTGATCTTCGAGCTTATGTGGA	Vector construction
MdUFGT-pGreenII-0800 R	cgctctagaactagtggatccTACAGCTTACAAGGCTAATTAGAAAAGG	Vector construction
MdGSTF12-pGreenII-0800 F	gtcgacggtatcgataagcttACTGTCGTTCGTTGAAATTTAGCTT	Vector construction
MdGSTF12-pGreenII-0800 R	cgctctagaactagtggatccCTTCTTGTACAACAAAGTGCTAGCC	Vector construction
MdERF78-YFPN F	gagaacacgggggactctagaATGGCGAGACCGCAACAGC	Vector construction
MdERF78-YFPN R	ctccatcccgggagcggtaccGGTAGGTTGTGGTGGCACAAC	Vector construction
MdMYB1-YFPC F	gagaacacgggggactctagaATGGAGGGATATAACGAAAACCTG	Vector construction
MdMYB1-YFPC R	gtacatcccgggagcggtaccTTCTTCTTTTGAATGATTCCAAAGG	Vector construction
MdMYB1-PAbAi F	aaatgatgaattgaaaagcttGAATCCTAATAAAGATTTATAGGCAAATTAT	Vector construction
MdMYB1-PAbAi R	atacagagcacatgcctcgagCACTCCAGAAAGACACCTAGCTACC	Vector construction
MdACO1-PAbAi F	aaatgatgaattgaaaagcttTCTAGATGCCATTTCTTAATTTTCAAA	Vector construction
MdACO1-PAbAi R	atacagagcacatgcctcgagTCAACTGGGAAAGTCGCCAT	Vector construction
MdACS1-PAbAi F	aaatgatgaattgaaaagcttGAACCACCAAGCACCTTTACACA	Vector construction
MdACS1-PAbAi R	atacagagcacatgcctcgagTTTGGTTAATTTTCTACTGTATGGATACA	Vector construction
MdCHS-PAbAi F	cttgaattcgagctcggtaccATCTGAGGTGTGGATCTTCCGG	Vector construction
MdCHS-PAbAi R	atacagagcacatgcctcgagTTTGATCGGGTCGTCAAGAAA	Vector construction
MdCHI-PAbAi F	cttgaattcgagctcggtaccAACAAAAAAGAGTCAAATCCAGTTTC	Vector construction
MdCHI-PAbAi R	atacagagcacatgcctcgagTTGACAATTTATATATTGTTTGACAATTTATAT	Vector construction
MdF3H-PAbAi F	cttgaattcgagctcggtaccGAAAGGTATACCAACAATGTCATTTTC	Vector construction
MdF3H-PAbAi R	atacagagcacatgcctcgagATTTTGGTGTTGAATTTGTTTGGC	Vector construction
MdDFR-PAbAi F	cttgaattcgagctcggtaccGATGTAATGAATAATATAAGAGAAAGGTAAAAA	Vector construction
MdDFR-PAbAi R	atacagagcacatgcctcgagATCTTGTGTGTATGTGCTTACCGAA	Vector construction
MdANS-PAbAi F	cttgaattcgagctcggtaccATGATCTAAGATTATTCATTTACTTCAAATATT	Vector construction
MdANS-PAbAi R	atacagagcacatgcctcgagTTTTGGAGCTGGCTTTCGAC	Vector construction
MdUFGT-PAbAi F	cttgaattcgagctcggtaccCATTGATCTTCGAGCTTATGTGGA	Vector construction
MdUFGT-PAbAi R	atacagagcacatgcctcgagTACAGCTTACAAGGCTAATTAGAAAAGG	Vector construction
MdGSTF12-PAbAi F	cttgaattcgagctcggtaccCATCTCTGTACGAGATAAATTATCACCA	Vector construction
MdGSTF12-PAbAi R	atacagagcacatgcctcgagCTTCTTGTACAACAAAGTGCTAGCC	Vector construction
MdERF78-pCAMBIA1302 F	acgggggactcttgaccatggATGGCGAGACCGCAACAGC	Vector construction
MdERF78--pCAMBIA1302 R	aagttcttctcctttactagtGGTAGGTTGTGGTGGCACAAC	Vector construction
MdERF78-pHELLSGATE4 F	ggggacaagtttgtacaaaaaagcaggctATGGCGAGACCGCAACAG	Vector construction
MdERF78-pHELLSGATE4 R	ggggaccactttgtacaagaaagctgggtTCATCTCTGGCATTTTCGCG	Vector construction
MdERF78-TRV F	aaggttaccgaattctctagaATGGCGAGACCGCAACAGC	Vector construction
MdERF78-TRV R	gggacatgcccgggcctcgagTCATCTCTGGCATTTTCGCG	Vector construction
MdDFR-pBI121 F	gaccatgattacgccaagcttATGTAATGAATAATATAAGAGAAAGGTAAAAATG	Vector construction
MdDFR-pBI121 R	ggactgaccacccggggatccATCTTGTGTGTATGTGCTTACCGAA	Vector construction
MdUFGT--pBI121 F	gaccatgattacgccaagcttCATTGATCTTCGAGCTTATGTGGA	Vector construction
MdUFGT--pBI121 R	ggactgaccacccggggatccTACAGCTTACAAGGCTAATTAGAAAAGG	Vector construction
MdGSTF12-pBI121 F	gaccatgattacgccaagcttCATCTCTGTACGAGATAAATTATCACCA	Vector construction
MdGSTF12-pBI121 R	ggactgaccacccggggatccCTTCTTGTACAACAAAGTGCTAGCC	Vector construction
35S-F	GACGCACAATCCCACTATCC	Vector detection
MdERF78-R	TTAGGTAGGTTGTGGTGGCAC	Vector detection
